# Supplementary material for: MnFe2O4-loaded bamboo pulp carbon-based aerogel composite: synthesis, characterization and adsorption behavior study for heavy metals removal
Source: Royal Society of Chemistry journal article supplement (doi:10.1039/d4ra06363e), 2024-01-01
Supplement: d4ra06363e1.pdf [file d4ra06363e1.pdf]

## Supporting Information

### **MnFe<sub>2</sub>O<sub>4</sub>-loaded bamboo pulp carbon-based aerogel composite: synthesis, characterization and adsorption behavior study for heavy metals removal**

Wenxiang Jing<sup>a,b,c</sup>, Chai Yang<sup>b</sup>, Xiaoyan Lin<sup>a,c\*</sup>, Min Tang<sup>b</sup>, Dongming Lian<sup>b</sup>, Ying Yu<sup>b</sup>, Dongyang Liu<sup>b</sup>

*a. School of Materials and Chemistry, Southwest University of Science and Technology, 621010, Mianyang, Sichuan, China*

*b. Yibin Forestry and Bamboo Industry Research Institute , Yibin 644005, China.*

*c. Engineering Research Center of Biomass Materials, Ministry of Education, Southwest University of Science and Technology, Mianyang 621010, China.*

*\* Corresponding author: Xiaoyan Lin; E-mail: lxy20100205@163.com*

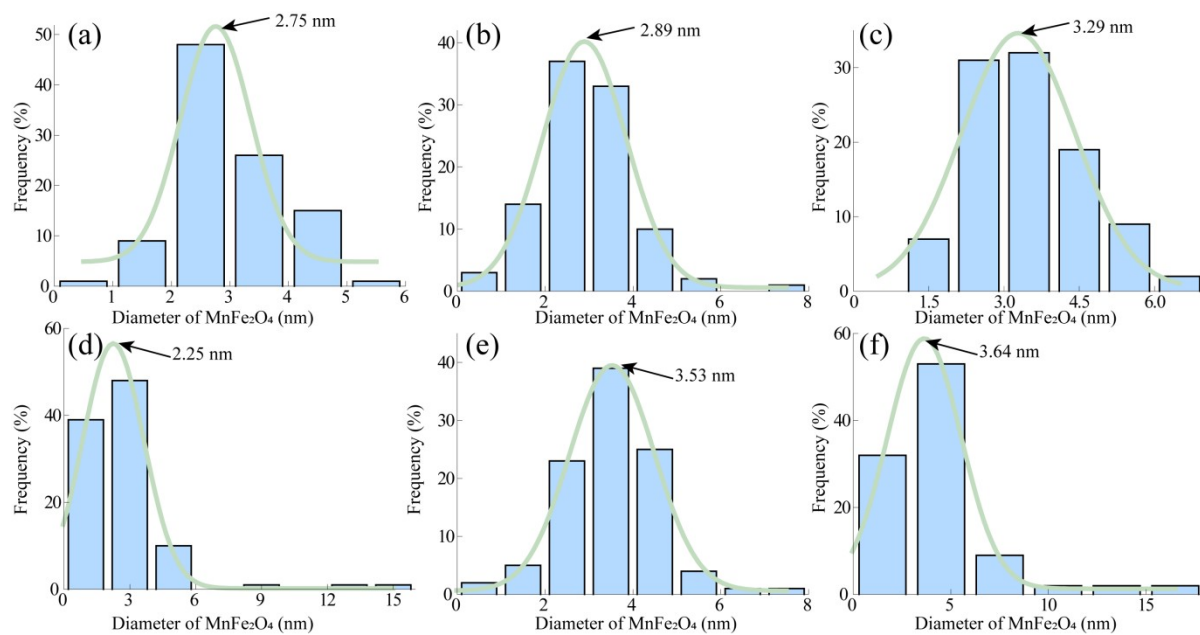

**Fig. S1** The particle size distribution of MnFe<sub>2</sub>O<sub>4</sub> on the surface of MCA obtained by directional freezing: (a) MCA1-2; (b) MCA1-3; (c) MCA1-4; (d) MCA2-1; (e) MCA2-2; (f) MCA2-3

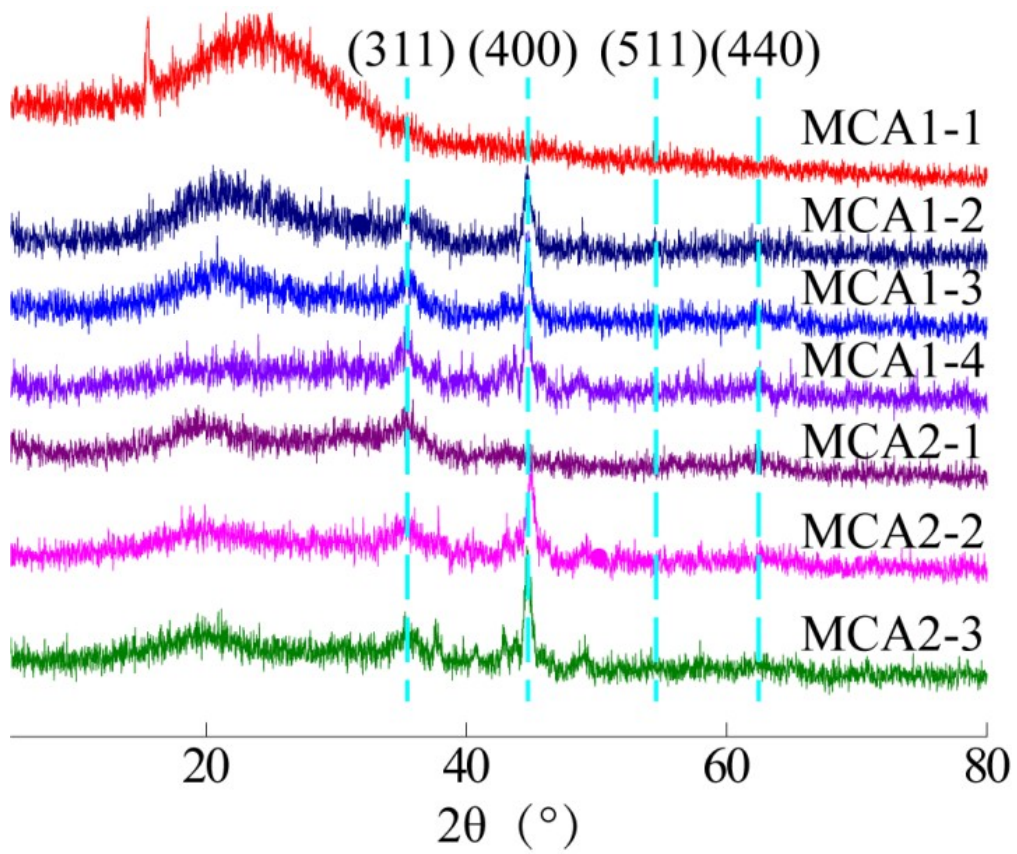

**Fig. S2** XRD characterization of MCA

**Table S1** Specific surface area, pore volume and porosity of MCA with different amounts of modifiers

| No.    | $S_{\text{BET}}$<br>/m <sup>2</sup> ·g <sup>-1</sup> | $D_{\text{pore}}$<br>/nm | $V_{\text{total pore}}$<br>/cm <sup>3</sup> ·g <sup>-1</sup> | $V_{<50\text{nm}}$<br>/cm <sup>3</sup> ·g <sup>-1</sup> | $V_{<50\text{ nm}}/V_{\text{total pore}}$ | $\rho/\%$ |
|--------|------------------------------------------------------|--------------------------|--------------------------------------------------------------|---------------------------------------------------------|-------------------------------------------|-----------|
| MCA1-1 | 182.67                                               | 4.077                    | 0.1772                                                       | 0.1447                                                  | 0.8166                                    | 95.33     |
| MCA1-2 | 128.79                                               | 5.890                    | 0.1515                                                       | 0.1025                                                  | 0.6766                                    | 90.51     |
| MCA1-3 | 112.09                                               | 5.122                    | 0.1358                                                       | 0.1186                                                  | 0.8733                                    | 80.88     |
| MCA1-4 | 109.72                                               | 4.897                    | 0.1085                                                       | 0.0838                                                  | 0.7724                                    | 66.18     |

$\rho_0$  is the density of graphite, 2.3 g/cm<sup>3</sup>

Pseudo-first-order kinetic equation (Equation S1) and pseudo-second-order kinetic equation (Equation S2) are as follows:

$$q_t = q_e(1 - e^{-k_1 t}) \quad (\text{Equation S1})$$

$$q_t = k_2 q_e^2 t / (1 + k_2 q_e t) \quad (\text{Equation S2})$$

Where  $q_e$  and  $q_t$  are the amounts of  $\text{Pb}^{2+}$ ,  $\text{Cu}^{2+}$ , or  $\text{Cd}^{2+}$  adsorbed at equilibrium and  $t$  min, respectively, mg/g;  $K_1$  is the rate constant of the pseudo-first-order kinetic model,  $\text{min}^{-1}$ ;  $K_2$  is the rate constant of the pseudo-second-order kinetic model,  $\text{g}/(\text{mg} \cdot \text{min})$ ;  $t$  is the adsorption time, min.

**Table S2** MCA adsorption kinetics fitting parameters for  $\text{Pb}^{2+}$  in single, binary, and ternary systems

| adsorbates                                     | concentration<br>(mg/L) | Pseudo-first-order model    |              |       | Pseudo-second-order model |              |       |
|------------------------------------------------|-------------------------|-----------------------------|--------------|-------|---------------------------|--------------|-------|
|                                                |                         | $K_1$ ( $\text{min}^{-1}$ ) | $q_e$ (mg/g) | $R^2$ | $K_2$<br>(g/mg·min)       | $q_e$ (mg/g) | $R^2$ |
| $\text{Pb}^{2+}$                               | 20                      | 0.0253                      | 16.74        | 0.985 | 0.0014                    | 19.91        | 0.974 |
|                                                | 40                      | 0.0346                      | 29.24        | 0.997 | 0.0013                    | 33.34        | 0.994 |
|                                                | 60                      | 0.0319                      | 38.88        | 0.957 | 0.0010                    | 43.83        | 0.971 |
| $\text{Pb}^{2+}/\text{Cu}^{2+}$                | 20                      | 0.0261                      | 9.55         | 0.981 | 0.0027                    | 11.24        | 0.966 |
|                                                | 40                      | 0.0301                      | 16.87        | 0.988 | 0.0020                    | 19.41        | 0.992 |
|                                                | 60                      | 0.0383                      | 18.93        | 0.994 | 0.0022                    | 21.55        | 0.974 |
| $\text{Pb}^{2+}/\text{Cd}^{2+}$                | 20                      | 0.0381                      | 12.10        | 0.950 | 0.0035                    | 13.73        | 0.916 |
|                                                | 40                      | 0.0474                      | 19.88        | 0.981 | 0.0029                    | 22.20        | 0.997 |
|                                                | 60                      | 0.0249                      | 25.59        | 0.987 | 0.0010                    | 30.15        | 0.983 |
| $\text{Pb}^{2+}/\text{Cu}^{2+}/\text{Cd}^{2+}$ | 20                      | 0.0266                      | 7.12         | 0.972 | 0.0039                    | 8.35         | 0.986 |
|                                                | 40                      | 0.0188                      | 13.74        | 0.979 | 0.0011                    | 17.27        | 0.966 |
|                                                | 60                      | 0.0268                      | 16.53        | 0.993 | 0.0015                    | 19.73        | 0.979 |

**Table S3** MCA adsorption kinetics fitting parameters for Cu<sup>2+</sup> in single, binary, and ternary systems

| adsorbates                                                | concentration<br>(mg/L) | Pseudo-first-order model            |                       |                | Pseudo-second-order model    |                       |                |
|-----------------------------------------------------------|-------------------------|-------------------------------------|-----------------------|----------------|------------------------------|-----------------------|----------------|
|                                                           |                         | K <sub>1</sub> (min <sup>-1</sup> ) | q <sub>e</sub> (mg/g) | R <sup>2</sup> | K <sub>2</sub><br>(g/mg·min) | q <sub>e</sub> (mg/g) | R <sup>2</sup> |
| Cu <sup>2+</sup>                                          | 20                      | 0.0196                              | 22.29                 | 0.981          | 0.0007                       | 28.09                 | 0.963          |
|                                                           | 40                      | 0.0304                              | 32.97                 | 0.969          | 0.0009                       | 38.89                 | 0.937          |
|                                                           | 60                      | 0.0438                              | 37.46                 | 0.985          | 0.0016                       | 41.40                 | 0.973          |
| Cu <sup>2+</sup> /Pb <sup>2+</sup>                        | 20                      | 0.0363                              | 11.70                 | 0.935          | 0.0035                       | 13.32                 | 0.903          |
|                                                           | 40                      | 0.0574                              | 16.53                 | 0.995          | 0.0048                       | 18.05                 | 0.988          |
|                                                           | 60                      | 0.0402                              | 20.44                 | 0.950          | 0.0023                       | 23.05                 | 0.983          |
| Cu <sup>2+</sup> /Cd <sup>2+</sup>                        | 20                      | 0.0421                              | 16.13                 | 0.962          | 0.0032                       | 18.03                 | 0.927          |
|                                                           | 40                      | 0.0170                              | 24.38                 | 0.975          | 0.0005                       | 31.16                 | 0.961          |
|                                                           | 60                      | 0.0250                              | 30.47                 | 0.971          | 0.0007                       | 36.67                 | 0.945          |
| Cu <sup>2+</sup> /Pb <sup>2+</sup> /Cd <sup>2+</sup><br>+ | 20                      | 0.0398                              | 8.31                  | 0.963          | 0.0059                       | 9.31                  | 0.986          |
|                                                           | 40                      | 0.0247                              | 14.70                 | 0.989          | 0.0017                       | 17.41                 | 0.986          |
|                                                           | 60                      | 0.0201                              | 20.02                 | 0.997          | 0.0009                       | 24.60                 | 0.994          |

**Table S4** MCA adsorption kinetics fitting parameters for Cd<sup>2+</sup> in single, binary, and ternary systems

| adsorbates                                           | concentration<br>(mg/L) | Pseudo-first-order model            |                       |                | Pseudo-second-order model    |                       |                |
|------------------------------------------------------|-------------------------|-------------------------------------|-----------------------|----------------|------------------------------|-----------------------|----------------|
|                                                      |                         | K <sub>1</sub> (min <sup>-1</sup> ) | q <sub>e</sub> (mg/g) | R <sup>2</sup> | K <sub>2</sub><br>(g/mg·min) | q <sub>e</sub> (mg/g) | R <sup>2</sup> |
| Cd <sup>2+</sup>                                     | 20                      | 0.0167                              | 15.28                 | 0.920          | 0.0007                       | 20.11                 | 0.892          |
|                                                      | 40                      | 0.0127                              | 29.46                 | 0.972          | 0.0003                       | 40.68                 | 0.961          |
|                                                      | 60                      | 0.0199                              | 36.52                 | 0.983          | 0.0004                       | 45.61                 | 0.969          |
| Cd <sup>2+</sup> /Pb <sup>2+</sup>                   | 20                      | 0.0214                              | 11.95                 | 0.966          | 0.0015                       | 14.74                 | 0.943          |
|                                                      | 40                      | 0.0234                              | 18.03                 | 0.998          | 0.0012                       | 21.77                 | 0.987          |
|                                                      | 60                      | 0.0384                              | 18.73                 | 0.964          | 0.0021                       | 21.58                 | 0.938          |
| Cd <sup>2+</sup> /Cu <sup>2+</sup>                   | 20                      | 0.0284                              | 7.63                  | 0.913          | 0.0045                       | 8.69                  | 0.955          |
|                                                      | 40                      | 0.0228                              | 12.69                 | 0.990          | 0.0016                       | 15.30                 | 0.977          |
|                                                      | 60                      | 0.0188                              | 17.03                 | 0.974          | 0.0010                       | 20.82                 | 0.983          |
| Cd <sup>2+</sup> /Pb <sup>2+</sup> /Cu <sup>2+</sup> | 20                      | 0.0137                              | 6.09                  | 0.930          | 0.0017                       | 7.82                  | 0.941          |
|                                                      | 40                      | 0.0195                              | 9.63                  | 0.988          | 0.0016                       | 12.06                 | 0.983          |
|                                                      | 60                      | 0.0295                              | 12.83                 | 0.989          | 0.0024                       | 14.93                 | 0.992          |



Langmuir isotherm model (Equation S3) and Freundlich isotherm model (Equation S4)

are as follows:

$$q_e = q_m K_L C_e / (1 + b C_e) \quad (\text{Equation S3})$$

$$q_e = K_F C_e^{1/n} \quad (\text{Equation S4})$$

Where  $q_e$  is the amount of  $\text{Pb}^{2+}$ ,  $\text{Cu}^{2+}$ , or  $\text{Cd}^{2+}$  adsorbed by MCA at equilibrium and  $q_m$  is saturation capacity of MCA for  $\text{Pb}^{2+}$ ,  $\text{Cu}^{2+}$ , or  $\text{Cd}^{2+}$ , mg/g;  $C_e$  is the concentration of  $\text{Pb}^{2+}$ ,  $\text{Cu}^{2+}$  and  $\text{Cd}^{2+}$  in the solution at equilibrium,  $\mu\text{g/mL}$ ;  $K_L$  is the adsorption equilibrium constant of Langmuir isothermal model, L/mg;  $K_F$  is the adsorption equilibrium constant of Freundlich isothermal model,  $\text{mg} \cdot \text{g}^{-1} \cdot (\text{L} \cdot \text{mg}^{-1})^{1/n}$ ;  $1/n$  is the adsorption intensity.

**Table S5** MCA adsorption isotherm curve fitting parameters for  $\text{Pb}^{2+}$  in single, binary, and ternary systems

| adsorbates                                     | temperature<br>(°C) | Langmuir isotherm model |        |       | Freundlich isotherm model |       |       |
|------------------------------------------------|---------------------|-------------------------|--------|-------|---------------------------|-------|-------|
|                                                |                     | $q_m$ (mg/g)            | $K_L$  | $R^2$ | n                         | $K_F$ | $R^2$ |
| $\text{Pb}^{2+}$                               | 25                  | 53.18                   | 0.0568 | 0.997 | 2.037                     | 6.02  | 0.983 |
|                                                | 35                  | 61.70                   | 0.0771 | 0.999 | 2.034                     | 8.07  | 0.970 |
|                                                | 45                  | 74.38                   | 0.0982 | 0.993 | 1.971                     | 10.55 | 0.947 |
| $\text{Pb}^{2+}/\text{Cu}^{2+}$                | 25                  | 30.47                   | 0.0444 | 0.946 | 2.064                     | 3.20  | 0.990 |
|                                                | 35                  | 34.31                   | 0.0055 | 0.975 | 2.167                     | 4.26  | 0.991 |
|                                                | 45                  | 37.01                   | 0.0751 | 0.963 | 2.384                     | 5.98  | 0.942 |
| $\text{Pb}^{2+}/\text{Cd}^{2+}$                | 25                  | 38.91                   | 0.0352 | 0.984 | 1.805                     | 2.90  | 0.951 |
|                                                | 35                  | 44.37                   | 0.0434 | 0.982 | 1.916                     | 4.07  | 0.947 |
|                                                | 45                  | 55.26                   | 0.0466 | 0.995 | 1.887                     | 5.31  | 0.968 |
| $\text{Pb}^{2+}/\text{Cu}^{2+}/\text{Cd}^{2+}$ | 25                  | 24.68                   | 0.0353 | 0.886 | 1.930                     | 2.08  | 0.943 |
|                                                | 35                  | 32.30                   | 0.0340 | 0.922 | 1.837                     | 2.45  | 0.973 |
|                                                | 45                  | 37.49                   | 0.0372 | 0.995 | 1.788                     | 2.83  | 0.966 |

**Table S6** MCA adsorption isotherm curve fitting parameters for  $\text{Cu}^{2+}$  in single, binary, and ternary systems

| adsorbates                                     | temperature<br>(°C) | Langmuir isotherm model |        |       | Freundlich isotherm model |       |       |
|------------------------------------------------|---------------------|-------------------------|--------|-------|---------------------------|-------|-------|
|                                                |                     | $q_m$ (mg/g)            | $K_L$  | $R^2$ | n                         | $K_F$ | $R^2$ |
| $\text{Cu}^{2+}$                               | 25                  | 44.54                   | 0.1402 | 0.978 | 2.668                     | 9.95  | 0.990 |
|                                                | 35                  | 63.86                   | 0.1103 | 0.957 | 2.291                     | 11.21 | 0.999 |
|                                                | 45                  | 84.21                   | 0.1014 | 0.933 | 2.160                     | 13.47 | 0.996 |
| $\text{Cu}^{2+}/\text{Pb}^{2+}$                | 25                  | 34.54                   | 0.0249 | 0.910 | 1.651                     | 1.80  | 0.853 |
|                                                | 35                  | 53.18                   | 0.0206 | 0.957 | 1.484                     | 1.98  | 0.926 |
|                                                | 45                  | 67.07                   | 0.0226 | 0.963 | 1.489                     | 2.67  | 0.940 |
| $\text{Cu}^{2+}/\text{Cd}^{2+}$                | 25                  | 44.57                   | 0.0550 | 0.985 | 1.950                     | 4.73  | 0.942 |
|                                                | 35                  | 49.26                   | 0.0834 | 0.992 | 2.071                     | 6.95  | 0.948 |
|                                                | 45                  | 52.63                   | 0.1317 | 0.971 | 2.239                     | 9.97  | 0.898 |
| $\text{Cu}^{2+}/\text{Pb}^{2+}/\text{Cd}^{2+}$ | 25                  | 28.56                   | 0.0390 | 0.988 | 2.005                     | 2.67  | 0.956 |
|                                                | 35                  | 32.50                   | 0.0447 | 0.978 | 2.008                     | 3.26  | 0.928 |
|                                                | 45                  | 36.14                   | 0.0574 | 0.949 | 2.128                     | 4.43  | 0.875 |

**Table S7** MCA adsorption isotherm curve fitting parameters for Cd<sup>2+</sup> in single, binary, and ternary systems

| adsorbates                                           | temperature<br>(°C) | Langmuir isotherm model |                |                | Freundlich isotherm model |                |                |
|------------------------------------------------------|---------------------|-------------------------|----------------|----------------|---------------------------|----------------|----------------|
|                                                      |                     | q <sub>m</sub> (mg/g)   | K <sub>L</sub> | R <sup>2</sup> | n                         | K <sub>F</sub> | R <sup>2</sup> |
| Cd <sup>2+</sup>                                     | 25                  | 61.05                   | 0.0338         | 0.953          | 1.692                     | 4.00           | 0.977          |
|                                                      | 35                  | 64.01                   | 0.0450         | 0.959          | 1.788                     | 5.39           | 0.971          |
|                                                      | 45                  | 73.63                   | 0.0509         | 0.941          | 1.753                     | 6.47           | 0.956          |
| Cd <sup>2+</sup> /Pb <sup>2+</sup>                   | 25                  | 20.20                   | 0.3478         | 0.878          | 4.421                     | 8.21           | 0.977          |
|                                                      | 35                  | 24.12                   | 0.4406         | 0.923          | 4.328                     | 10.22          | 0.988          |
|                                                      | 45                  | 26.47                   | 0.6602         | 0.926          | 4.707                     | 12.77          | 0.982          |
| Cd <sup>2+</sup> /Cu <sup>2+</sup>                   | 25                  | 31.02                   | 0.0187         | 0.993          | 1.496                     | 1.10           | 0.981          |
|                                                      | 35                  | 37.46                   | 0.0212         | 0.991          | 1.458                     | 1.37           | 0.980          |
|                                                      | 45                  | 55.35                   | 0.0158         | 0.989          | 1.307                     | 1.31           | 0.980          |
| Cd <sup>2+</sup> /Pb <sup>2+</sup> /Cu <sup>2+</sup> | 25                  | 30.71                   | 0.0252         | 0.984          | 1.417                     | 0.84           | 0.977          |
|                                                      | 35                  | 31.00                   | 0.1049         | 0.991          | 1.509                     | 1.37           | 0.965          |
|                                                      | 45                  | 36.29                   | 0.0331         | 0.974          | 1.501                     | 1.92           | 0.947          |

The thermodynamic parameters of the adsorption process are calculated by Equations (S5)-(S8).

$$\ln K = \frac{\Delta S^\theta}{R} - \frac{\Delta H^\theta}{RT} \quad \text{(Equation S5)}$$

$$\Delta G^\theta = -RT \ln K \quad \text{(Equation S6)}$$

$$\Delta G^\theta = \Delta H^\theta - T \Delta S^\theta \quad \text{(Equation S7)}$$

$$K_d = \frac{q_e}{C_e} \quad \text{(Equation S8)}$$

Where R is the ideal gas constant, 8.314 J/(mol • K); T is the absolute temperature, K;  $\Delta G^\theta$  is the change of Gibbs free energy, J/K;  $\Delta H^\theta$  is the change of enthalpy, J/K;  $\Delta S^\theta$  is change of entropy, J/(mol • K); K is the equilibrium constant, (L/mol);  $q_e$  is the amount of  $Pb^{2+}$ ,  $Cu^{2+}$  or  $Cd^{2+}$  in the MCA at equilibrium;  $C_e$  is the concentration of  $Pb^{2+}$ ,  $Cu^{2+}$  or  $Cd^{2+}$  in the solution at equilibrium, mg/L.

**Table S8** Thermodynamic parameters of Pb<sup>2+</sup>adsorption by MCA in single, binary, and ternary systems

| adsorbates                                           | $\Delta G^\theta$ (kJ/mol) |        |        | $\Delta H^\theta$<br>(kJ/mol) | $\Delta S^\theta$ (kJ/mol·K) |
|------------------------------------------------------|----------------------------|--------|--------|-------------------------------|------------------------------|
|                                                      | 25°C                       | 35 °C  | 45 °C  |                               |                              |
| Pb <sup>2+</sup>                                     | -1.152                     | -2.324 | -3.589 | 35.162                        | 0.122                        |
| Pb <sup>2+</sup> /Cu <sup>2+</sup>                   | -0.311                     | -0.354 | -1.001 | 20.551                        | 0.066                        |
| Pb <sup>2+</sup> /Cd <sup>2+</sup>                   | -0.072                     | -0.656 | -0.879 | 23.517                        | 0.077                        |
| Pb <sup>2+</sup> /Cu <sup>2+</sup> /Cd <sup>2+</sup> | -0.631                     | -1.093 | -1.770 | 18.782                        | 0.057                        |

**Table S9** Thermodynamic parameters of Cu<sup>2+</sup>adsorption by MCA in single, binary, and ternary systems

| adsorbates                                           | $\Delta G^\theta$ (kJ/mol) |        |        | $\Delta H^\theta$<br>(kJ/mol) | $\Delta S^\theta$ (kJ/mol·K) |
|------------------------------------------------------|----------------------------|--------|--------|-------------------------------|------------------------------|
|                                                      | 25°C                       | 35 °C  | 45 °C  |                               |                              |
| Cu <sup>2+</sup>                                     | -1.958                     | -2.906 | -3.829 | 25.933                        | 0.094                        |
| Cu <sup>2+</sup> /Pb <sup>2+</sup>                   | -0.040                     | -0.819 | -1.656 | 26.941                        | 0.085                        |
| Cu <sup>2+</sup> /Cd <sup>2+</sup>                   | -0.189                     | -1.573 | -3.004 | 41.776                        | 0.141                        |
| Cu <sup>2+</sup> /Pb <sup>2+</sup> /Cd <sup>2+</sup> | -0.236                     | -0.987 | -1.704 | 23.581                        | 0.073                        |

**Table S10** Thermodynamic parameters of Cd<sup>2+</sup>adsorption by MCA in single, binary, and ternary systems

| adsorbates                                           | $\Delta G^\theta$ (kJ/mol) |        |        | $\Delta H^\theta$<br>(kJ/mol) | $\Delta S^\theta$ (kJ/mol·K) |
|------------------------------------------------------|----------------------------|--------|--------|-------------------------------|------------------------------|
|                                                      | 25°C                       | 35 °C  | 45 °C  |                               |                              |
| Cd <sup>2+</sup>                                     | -0.804                     | -1.519 | -2.327 | 21.878                        | 0.076                        |
| Cd <sup>2+</sup> /Pb <sup>2+</sup>                   | -0.531                     | -1.719 | -2.832 | 33.784                        | 0.115                        |
| Cd <sup>2+</sup> /Cu <sup>2+</sup>                   | -1.130                     | -1.600 | -2.387 | 21.167                        | 0.063                        |
| Cd <sup>2+</sup> /Pb <sup>2+</sup> /Cu <sup>2+</sup> | -0.628                     | -1.752 | -2.803 | 35.207                        | 0.109                        |



Distribution coefficient ( $K_d$ ) and adsorption selectivity factor  $\alpha_M^A$  are calculated by Equations (S9)-(S10).  $K_d$  represents the strength of the affinity of the adsorbent to the adsorbate, L/g.  $\alpha_M^A$  represents the adsorption selectivity factor of the adsorbent on the target ion (A) in the solution with interfering ions (M).

$$K_d = (C_0 - C_e) / C_e \times V / m \quad \text{(Equation S9)}$$

$$\alpha_M^A = \frac{q_A C_M}{q_M C_A} \quad \text{(Equation S10)}$$

Where  $C_0$  is the concentration of heavy metals in the solution before adsorption, mg/mL,  $C_e$  is the concentration of heavy metals in solution at adsorption equilibrium, g/ml,  $V$  is the volume of sample solution, mL;  $m$  is the weight of sample, g;  $q_A$  is the adsorption amount of A at adsorption equilibrium, mg/g;  $q_M$  is the adsorption amount of M at adsorption equilibrium, mg/g;  $C_A$  is the concentration of A in solution at adsorption equilibrium, mg/L;  $C_M$  is the concentration of M in solution at adsorption equilibrium, mg/L.

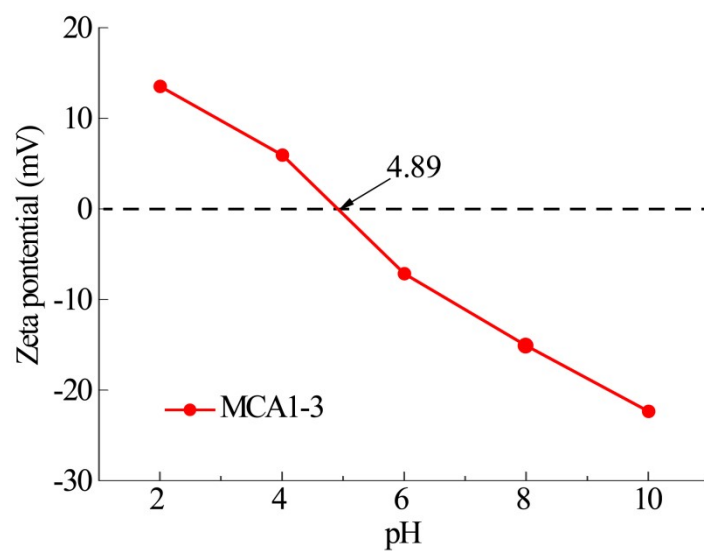

**Fig. S3** The zeta potentials of MCA1-3 at different pH in the presence of  $\text{KNO}_3$  ( $10^{-3}\text{mol}\cdot\text{L}^{-1}$ ).

**Table S11** Comparison of MCA with other biomass based materials.

| Adsorbent                                                                             | Initial concentration ( $\mu\text{g/mL}$ ) |                  |                  | Adsorption capacity ( $\text{mg/g}$ ) |                  |                  | Ref.      |
|---------------------------------------------------------------------------------------|--------------------------------------------|------------------|------------------|---------------------------------------|------------------|------------------|-----------|
|                                                                                       | $\text{Pb}^{2+}$                           | $\text{Cu}^{2+}$ | $\text{Cd}^{2+}$ | $\text{Pb}^{2+}$                      | $\text{Cu}^{2+}$ | $\text{Cd}^{2+}$ |           |
| Magnetic carbon quantum dots from Pomegranate peel ( $\text{Fe}_3\text{O}_4$ -PPCQDs) | 150                                        | /                | 150              | 17.92                                 | /                | 23.75            | [1]       |
| magnetic multi-functional biochar adsorbents (MMF-BC)                                 | 25                                         | /                | 25               | 61.25                                 | /                | 53.72            | [2]       |
| Wood ash amended biochar                                                              | 150                                        | 150              | 150              | 61.5                                  | 38.9             | 10.2             | [3]       |
| Garden waste biochar                                                                  | 300                                        | 300              | /                | 45.9                                  | 25.2             | /                | [4]       |
| MCA                                                                                   | 60                                         | 60               | 60               | 74.38                                 | 84.21            | 73.63            | This work |
